# Supplementary material
Source: publisher site journal article supplement (https://www.spandidos-publications.com/3547/downloadSupplementary)

Figure S1. Representative images of the Transwell migration assay for each group. Magnification, x200. miR, microRNA; BBC3, Bcl-2 binding component 3; siRNA, small interfering RNA.

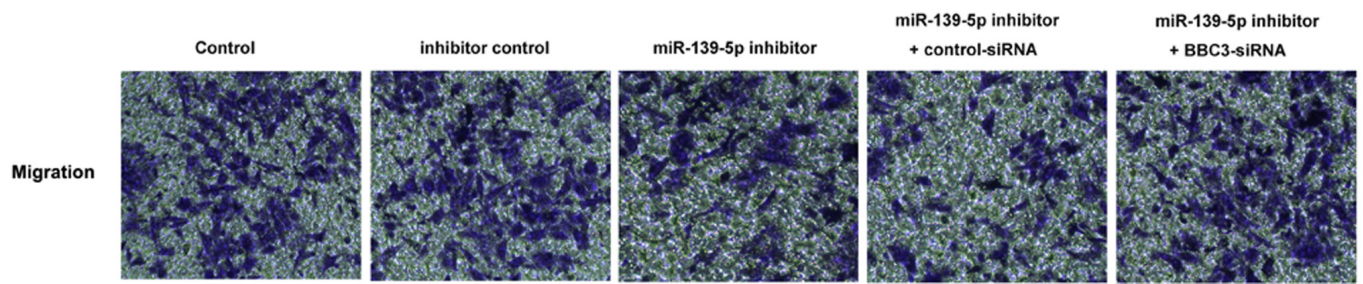

Figure S2. Representative images of the Transwell invasion assay for each group. Magnification, x200. miR, microRNA; BBC3, Bcl-2 binding component 3; siRNA, small interfering RNA.

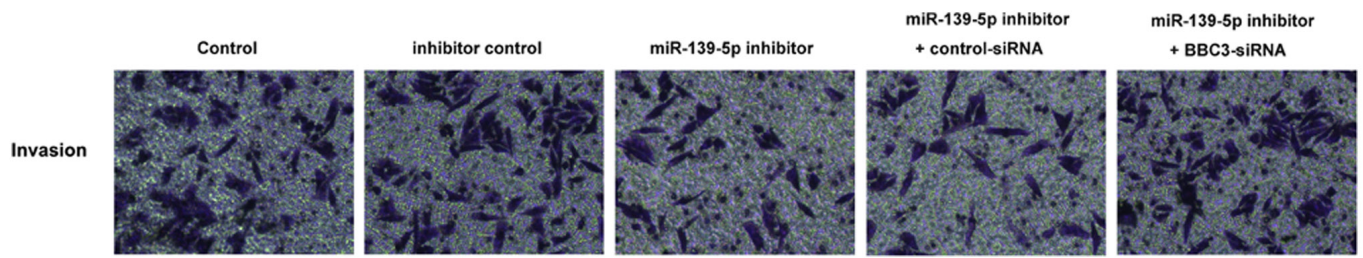

Supplement: Supplementary file 1 [file downloadSupplementary]
